# Supplementary material for: Rock slope displacement prediction based on multi-source information fusion and SSA-DELM model
Source: Frontiers journal article supplement (doi:10.3389/fenvs.2022.982069), 2022-09-28
Supplement: Table_2.XLSX [file Table_2.XLSX]

## Sheet: Sheet1
Data	Cumulative displacement	Daily rainfall	Cumulative rainfall	Temperature	Temperature difference	Runoff volume	Wind power	Stress	Pore water pressure
20210825	2.67	0.06	0.06	20.21	5.88	357.92	1.95	9.56	228.5
20210826	3.3	0.01	0.07	19.19	6.55	355.7	1.25	9.88	229.5
20210827	6.73	0	0.07	20.41	9.39	344.11	1.79	9.89	230.5
20210828	5.76	0.49	0.56	19.22	5.74	329	1.56	9.94	231.5
20210829	5.92	0.32	0.88	19.63	6.94	319.23	1.8	10.17	232.5
20210830	6.34	9.75	10.63	17.54	1.63	315.66	1.15	10.14	233.5
20210831	7.82	8.08	18.71	17.71	2.65	315.94	0.8	10.21	234.5
20210901	9.09	0.82	19.53	18.91	4.56	316.969	1.56	10.19	235.5
20210902	9.95	0.66	20.19	19.79	3.91	312.625	1.46	10.2	236.5
20210903	13.45	19.08	39.27	18.1	4.36	310.984	1.71	10.25	237.5
20210904	17.38	0.07	39.34	20	6.94	325.078	1.67	10.23	238.5
20210905	19.21	21.05	60.39	16.3	1.63	350.938	1.91	10.25	239.5
20210906	21.88	0	60.39	17.07	5.89	378.828	1.38	10.24	240.5
20210907	23.9	0	60.39	18.74	11.22	387.328	1.31	10.27	241.5
20210908	24.33	0	60.39	21.16	11.85	374.25	1.02	10.29	242.5
20210909	25.39	0.06	60.45	22.95	13.14	357.734	1.81	10.3	243.5
20210910	26.06	0	60.45	22.48	13.88	339.609	1.63	10.31	235.4
20210911	26.44	0	60.45	22.34	10.33	321.094	1.54	10.45	225.6
20210912	26.24	0.19	60.64	22.18	11.57	303.062	2.49	10.52	224.5
20210913	26.5	0	60.64	21.71	11.72	288.062	2.9	10.56	222.9
20210914	27.59	0.15	60.79	20.41	8.16	275.375	1.31	10.57	220.4
20210915	27.8	7.37	68.16	18.22	5.56	266.578	1.86	10.85	219.7
20210916	27.35	3.68	71.84	16.05	1.94	270.828	1.03	10.74	225.9
20210917	28.08	22.21	94.05	16.01	1.3	302.109	1.15	10.85	240.6
20210918	30.42	24.16	118.21	14.89	2.03	369.938	2.17	10.86	260.5
20210919	31.06	4.29	122.5	16.17	9.57	458.812	1.67	10.88	270.6
20210920	32.02	0.04	122.54	18.7	12.74	527.156	1.76	10.88	286.4
20210921	33.07	0	122.54	21.16	13.5	575.398	1.55	10.88	285.4
20210922	33.87	18.39	140.93	17.31	6.06	610.586	1.58	10.78	294.2
20210923	35.75	5.39	146.32	15.97	1.84	641.93	1.14	10.79	295.4
20210924	36.33	9.25	155.57	16.84	2.41	681.844	1.02	10.85	294.5
20210925	38.35	62.79	218.36	17.17	1.72	908.453	1.05	10.95	298.55
20210926	41.29	20.13	238.49	16.06	1.67	1260.87	0.72	11.01	300.45
20210927	46.86	16.31	254.8	15.23	1.32	1509.34	0.93	11.02	305.77
20210928	48.87	0.19	254.99	16.65	8.7	1621.72	1.01	11.12	304.52
20210929	49.96	0.11	255.1	17.93	10.33	1629.64	1.19	11.15	308.44
20210930	51.87	0.04	255.14	19.33	10.15	1551.12	1.17	11.16	306.45
20211001	53.96	0.02	255.16	20.09	9.84	1419.11	1.16	11.17	305.36
20211002	56.29	25.52	280.68	19.9	9.22	1314.06	1.78	11.19	303.45
20211003	59.72	27.86	308.54	14.38	9.37	1350.47	3.45	11.25	307.57
20211004	63.35	36.01	344.55	9.54	1.97	1609.29	3.09	11.27	310.34
20211005	65.96	18.04	362.59	9.7	1.56	1927.76	1.8	11.34	312.86
20211006	66.71	13.13	375.72	11.14	2.81	2214.83	0.95	11.38	315.62
20211007	68.73	0.69	376.41	10.92	4.2	2454.89	1.7	11.45	320.56
20211008	69.33	5.37	381.78	11.57	2.66	2507.49	1.54	11.42	324.54
20211009	70.74	11.86	393.64	6.66	9.83	2389.45	3.33	11.47	321.14
20211010	72.17	4.55	398.19	4.34	2.86	2241.66	1.32	11.54	319.63
20211011	74.32	3.77	401.96	6.09	2.97	2127.74	1.61	11.84	318.65
20211012	76.75	3.02	404.98	8.13	2.2	2030.34	1.16	11.87	316.72
20211013	78.31	0.65	405.63	11.04	3.57	1906.67	1.4	11.95	315.86
20211014	80.54	0.54	406.17	10.69	4.43	1771.41	2.29	12.35	313.88
20211015	85.73	2.56	408.73	8.02	2.74	1658.38	1.37	13.32	313.86
20211016	89.89	0.01	408.74	9.41	7.79	1558.65	1.48	13.24	312.74
20211017	93.11	0.13	408.87	8.08	4.7	1463.63	1.7	14.27	312.57
20211018	97.09	0.77	409.64	11.23	9.65	1368.63	1.11	14.87	311.24
20211019	99.99	12.3	421.94	8.47	3.34	1278.11	1.93	15.21	310.86
20211020	103.19	0.29	422.23	7.04	2.99	1234.78	1.32	15.67	309.45
20211021	106.3	0	422.23	7.21	8.64	1207.17	1.17	16.18	309.76
20211022	108.9	0.13	422.36	7.89	7.48	1177.28	2.02	17.17	308.53
20211023	111.33	0.73	423.09	7.63	3.5	1135.88	1.41	17.23	307.56
20211024	116.71	0.06	423.15	9.46	9.61	1062.76	0.93	17.64	306.86
20211025	114.33	12.65	435.8	9.63	4.2	987.242	1.6	17.57	303.87
20211026	117.66	0.01	435.81	9.47	5.06	954.289	1.19	18.19	304.56
20211027	120.47	0.17	435.98	8.7	3.89	941.562	0.9	19.18	303.44
20211028	122.38	0	435.98	10.35	6.49	918.258	0.77	20.24	299.36
20211029	124.84	0	435.98	10.85	10.59	877.523	1.02	20.45	298.63
20211030	126.86	5.86	441.84	11.45	8.1	820.516	1.03	20.65	299.31
20211031	129.49	0.86	442.7	9.83	5.82	769.188	1.37	21.86	298.34
20211101	130.03	3.83	446.53	7.24	2.45	721.234	1.58	21.17	297.45
20211102	131.54	0.29	446.82	8.88	7.26	680.266	0.9	22.57	298.89
20211103	133.34	0.01	446.83	9.44	5.86	653.344	1.36	23.47	297.63
20211104	134.62	0.26	447.09	9.7	5.65	628.109	1.78	25.65	296.53
20211105	137.63	0.72	447.81	9.72	9.1	605.969	2.92	26.54	297.54
20211106	138.54	5.1	452.91	-1.47	10.4	586.148	5.5	26.35	296.21
20211107	139.18	0	452.91	-1.67	10.18	563.969	1.9	26.87	295.36
20211108	145.34	0	452.91	0.9	15.1	529.102	1.23	26.54	293.57
20211109	145.79	0	452.91	2.14	14.53	493.695	1.56	27.45	292.32
20211110	142.7	0	452.91	3.07	8.54	462.445	1.88	28.69	296.34
20211111	143.17	0	452.91	2.43	10.53	432.078	1.89	29.63	297.54
20211112	144.21	0	452.91	2.93	15.39	401.523	0.92	30.54	295.41
20211113	145.62	0	452.91	5.09	13.03	371.469	1.1	31.09	293.63
20211114	146.53	0.13	453.04	3.88	10.52	346.234	0.99	32.56	294.75
20211115	147.35	0	453.04	3.99	10.79	327.406	1.15	33.09	292.96
20211116	149.56	0	453.04	4.95	9.12	311.312	1.07	35.62	291.36
20211117	151.35	0	453.04	7.01	12.12	298	0.92	34.35	291.58
20211118	153.24	0	453.04	5.93	12.08	287.406	1.77	36.05	292.47
20211119	153.44	0	453.04	7.6	10.95	279.445	2.09	37.01	290.53
20211120	144.21	0.01	453.05	4.33	5.3	274.062	2.46	39.26	280.44
20211121	144.78	0	453.05	0.72	8.98	269.68	2.66	39.69	284.78
20211122	154.63	0	453.05	-0.91	9.34	265.047	1.15	40.96	282.61
20211123	155.35	0	453.05	3.23	11.65	260.672	1.01	42.87	288.65
20211124	156.98	0	453.05	4.12	13.74	256.82	0.93	43.78	283.42
20211125	152.35	0	453.05	3.96	12.58	253.25	1.19	44.36	283.21
20211126	148.96	0.34	453.39	4.88	9.16	249.797	1.53	45.36	283.4
20211127	149.48	0.06	453.45	4.39	8.06	247.031	2.04	47.56	289.41
20211128	147.78	1.07	454.52	5.18	10.66	245.375	2.72	48.89	281.54
20211129	148.24	0.02	454.54	0.98	8.59	245.688	1.99	48.85	281.39
20211130	149.47	0	454.54	0.22	8.41	247.688	1.14	49.63	281.37
