# Supplementary material for: Rock slope displacement prediction based on multi-source information fusion and SSA-DELM model
Source: Frontiers journal article supplement (doi:10.3389/fenvs.2022.982069), 2022-09-28
Supplement: Table_3.XLS [file Table_3.XLS]

## Sheet: uv_bmwy_devicedata
Data	Cumulative displacement	daily rainfall	Cumulative rainfall	Temperature	Temperature difference	Runoff volume	wind power	Stress	Pore water pressure
20210825	5.95	0.06	0.06	20.21	5.88	357.92	1.95	10.56	258.5
20210826	5.97	0.01	0.07	19.19	6.55	355.7	1.25	10.88	261.1
20210827	6.86	0	0.07	20.41	9.39	344.11	1.79	10.89	268.3
20210828	6.24	0.49	0.56	19.22	5.74	329	1.56	10.94	267.6
20210829	6.81	0.32	0.88	19.63	6.94	319.23	1.8	10.17	265.6
20210830	6.4	9.75	10.63	17.54	1.63	315.66	1.15	10.14	266.2
20210831	6.15	8.08	18.71	17.71	2.65	315.94	0.8	10.21	265.8
20210901	8.34	0.82	19.53	18.91	4.56	316.969	1.56	10.19	275.9
20210902	9.49	0.66	20.19	19.79	3.91	312.625	1.46	10.2	275.4
20210903	11.76	19.08	39.27	18.1	4.36	310.984	1.71	10.25	274.9
20210904	13.62	0.07	39.34	20	6.94	325.078	1.67	10.23	273.6
20210905	14.34	21.05	60.39	16.3	1.63	350.938	1.91	10.25	272.5
20210906	15.13	0	60.39	17.07	5.89	378.828	1.38	10.24	276.5
20210907	15.61	0	60.39	18.74	11.22	387.328	1.31	10.27	276.4
20210908	15.95	0	60.39	21.16	11.85	374.25	1.02	10.29	280.4
20210909	16.05	0.06	60.45	22.95	13.14	357.734	1.81	10.3	281.6
20210910	16.04	0	60.45	22.48	13.88	339.609	1.63	10.31	285.4
20210911	16.71	0	60.45	22.34	10.33	321.094	1.54	10.45	285.6
20210912	17.73	0.19	60.64	22.18	11.57	303.062	2.49	10.52	284.5
20210913	17.91	0	60.64	21.71	11.72	288.062	2.9	10.56	282.9
20210914	17.64	0.15	60.79	20.41	8.16	275.375	1.31	10.57	290.4
20210915	18.85	7.37	68.16	18.22	5.56	266.578	1.86	10.85	289.7
20210916	19.01	3.68	71.84	16.05	1.94	270.828	1.03	10.74	296.9
20210917	20.05	22.21	94.05	16.01	1.3	302.109	1.15	10.85	300.65
20210918	17.74	24.16	118.21	14.89	2.03	369.938	2.17	10.86	305.63
20210919	17.52	4.29	122.5	16.17	9.57	458.812	1.67	10.88	306.78
20210920	17.6	0.04	122.54	18.7	12.74	527.156	1.76	10.88	306.54
20210921	18.13	0	122.54	21.16	13.5	575.398	1.55	10.88	310.57
20210922	18.17	18.39	140.93	17.31	6.06	610.586	1.58	10.78	315.47
20210923	18.14	5.39	146.32	15.97	1.84	641.93	1.14	10.79	316.75
20210924	18.63	9.25	155.57	16.84	2.41	681.844	1.02	10.85	318.67
20210925	25.63	62.79	218.36	17.17	1.72	908.453	1.05	10.9	330.67
20210926	27.24	20.13	238.49	16.06	1.67	1260.87	0.72	10.93	329.45
20210927	28.54	16.31	254.8	15.23	1.32	1509.34	0.93	10.93	335.78
20210928	27.36	0.19	254.99	16.65	8.7	1621.72	1.01	10.97	338.45
20210929	27.84	0.11	255.1	17.93	10.33	1629.64	1.19	10.99	335.68
20210930	28.34	0.04	255.14	19.33	10.15	1551.12	1.17	11.24	339.48
20211001	28.56	0.02	255.16	20.09	9.84	1419.11	1.16	11.35	345.68
20211002	28.97	25.52	280.68	19.9	9.22	1314.06	1.78	11.32	352.35
20211003	29.47	27.86	308.54	14.38	9.37	1350.47	3.45	11.31	360.78
20211004	32.45	36.01	344.55	9.54	1.97	1609.29	3.09	11.36	370.85
20211005	34.87	18.04	362.59	9.7	1.56	1927.76	1.8	11.75	378.85
20211006	35.98	13.13	375.72	11.14	2.81	2214.83	0.95	12.03	380.54
20211007	36.12	0.69	376.41	10.92	4.2	2454.89	1.7	12.04	378.25
20211008	37.58	5.37	381.78	11.57	2.66	2507.49	1.54	12.05	375.52
20211009	38.12	11.86	393.64	6.66	9.83	2389.45	3.33	12.08	382.45
20211010	39.04	4.55	398.19	4.34	2.86	2241.66	1.32	12.15	381.57
20211011	39.54	3.77	401.96	6.09	2.97	2127.74	1.61	12.16	383.65
20211012	38.24	3.02	404.98	8.13	2.2	2030.34	1.16	12.17	385.78
20211013	39.45	0.65	405.63	11.04	3.57	1906.67	1.4	12.17	385.32
20211014	40.14	0.54	406.17	10.69	4.43	1771.41	2.29	12.18	383.45
20211015	43.55	2.56	408.73	8.02	2.74	1658.38	1.37	12.19	389.78
20211016	46.39	0.01	408.74	9.41	7.79	1558.65	1.48	12.19	382.54
20211017	48.7	0.13	408.87	8.08	4.7	1463.63	1.7	12.19	381.24
20211018	50.01	0.77	409.64	11.23	9.65	1368.63	1.11	12.21	378.24
20211019	52.3	12.3	421.94	8.47	3.34	1278.11	1.93	12.34	384.57
20211020	54.59	0.29	422.23	7.04	2.99	1234.78	1.32	12.24	378.65
20211021	56.29	0	422.23	7.21	8.64	1207.17	1.17	12.27	350.54
20211022	58.8	0.13	422.36	7.89	7.48	1177.28	2.02	12.75	357.58
20211023	61.28	0.73	423.09	7.63	3.5	1135.88	1.41	12.78	350.37
20211024	63.57	0.06	423.15	9.46	9.61	1062.76	0.93	12.78	357.54
20211025	65.59	12.65	435.8	9.63	4.2	987.242	1.6	12.85	352.12
20211026	68.19	0.01	435.81	9.47	5.06	954.289	1.19	12.85	351.47
20211027	71.15	0.17	435.98	8.7	3.89	941.562	0.9	12.85	350.46
20211028	72.89	0	435.98	10.35	6.49	918.258	0.77	12.85	342.12
20211029	75.1	0	435.98	10.85	10.59	877.523	1.02	12.85	338.54
20211030	77.03	5.86	441.84	11.45	8.1	820.516	1.03	12.85	337.56
20211031	79.59	0.86	442.7	9.83	5.82	769.188	1.37	12.85	337.24
20211101	80	3.83	446.53	7.24	2.45	721.234	1.58	12.86	345.21
20211102	82.01	0.29	446.82	8.88	7.26	680.266	0.9	12.89	352.14
20211103	84.61	0.01	446.83	9.44	5.86	653.344	1.36	12.86	335.75
20211104	85.4	0.26	447.09	9.7	5.65	628.109	1.78	12.98	331.25
20211105	87.2	0.72	447.81	9.72	9.1	605.969	2.92	12.99	329.78
20211106	88.39	5.1	452.91	-1.47	10.4	586.148	5.5	13.05	323.69
20211107	85.36	0	452.91	-1.67	10.18	563.969	1.9	12.87	321.75
20211108	87.69	0	452.91	0.9	15.1	529.102	1.23	12.87	317.56
20211109	89.39	0	452.91	2.14	14.53	493.695	1.56	12.85	312.47
20211110	91.14	0	452.91	3.07	8.54	462.445	1.88	12.86	310.53
20211111	91.72	0	452.91	2.43	10.53	432.078	1.89	12.83	308.65
20211112	91.91	0	452.91	2.93	15.39	401.523	0.92	12.82	307.54
20211113	97.24	0	452.91	5.09	13.03	371.469	1.1	12.79	298.54
20211114	98.35	0.13	453.04	3.88	10.52	346.234	0.99	12.79	296.35
20211115	98.12	0	453.04	3.99	10.79	327.406	1.15	12.75	294.54
20211116	96.78	0	453.04	4.95	9.12	311.312	1.07	12.75	298.57
20211117	102.75	0	453.04	7.01	12.12	298	0.92	12.81	284.35
20211118	103.68	0	453.04	5.93	12.08	287.406	1.77	12.78	279.24
20211119	104.57	0	453.04	7.6	10.95	279.445	2.09	12.78	278.34
20211120	106.42	0.01	453.05	4.33	5.3	274.062	2.46	11.45	273.41
20211121	108.75	0	453.05	0.72	8.98	269.68	2.66	11.75	271.57
20211122	105.78	0	453.05	-0.91	9.34	265.047	1.15	11.75	268.67
20211123	106.74	0	453.05	3.23	11.65	260.672	1.01	11.68	268.78
20211124	102.17	0	453.05	4.12	13.74	256.82	0.93	11.87	274.58
20211125	108.08	0	453.05	3.96	12.58	253.25	1.19	11.87	261.54
20211126	107.75	0.34	453.39	4.88	9.16	249.797	1.53	11.87	267.13
20211127	108.63	0.06	453.45	4.39	8.06	247.031	2.04	11.57	264.54
20211128	108.78	1.07	454.52	5.18	10.66	245.375	2.72	11.87	267.58
20211129	107.59	0.02	454.54	0.98	8.59	245.688	1.99	11.35	268.04
20211130	108.12	0	454.54	0.22	8.41	247.688	1.14	11.67	266.78
